1 **Title:**

2 Implicating candidate genes at GWAS signals by leveraging topologically associating  
3 domains

4 **Running Title:**

5 TADs aid candidate gene discovery from GWAS

6 **Authors:**

7 Gregory P. Way<sup>1,2</sup>, Daniel W. Youngstrom<sup>3</sup>, Kurt D. Hankenson<sup>3</sup>, Casey S. Greene<sup>2\*</sup>,  
8 and Struan F.A. Grant<sup>4,5\*</sup>

9 \* These authors directed this work jointly

10 **Affiliations:**

11 <sup>1</sup>Genomics and Computational Biology Graduate Program, University of Pennsylvania,  
12 Philadelphia, PA 19104, USA

13 <sup>2</sup>Department of Systems Pharmacology and Translational Therapeutics, University of  
14 Pennsylvania, Philadelphia, PA 19104, USA

15 <sup>3</sup>Department of Orthopaedic Surgery, School of Medicine, University of Michigan, Ann  
16 Arbor, MI, USA

17 <sup>4</sup>Department of Pediatrics, Perelman School of Medicine, University of Pennsylvania,  
18 Philadelphia, PA 19104, USA

19 <sup>5</sup>Division of Human Genetics, Division of Endocrinology and Diabetes, The Children's  
20 Hospital of Philadelphia, Philadelphia, PA 19104, USA

21

22

23

24 **Co-Corresponding Authors:\***

Struan F.A. Grant

Casey S. Greene

Rm 1102D, 3615 Civic Center Blvd

10-131 SCTR 34th and Civic Center Blvd,

Philadelphia, PA 19104

Philadelphia, PA 19104

Office: 267-426-2795

Office: 215-573-2991

Fax: 215-590-1258

Fax: 215-573-9135

25 **Conflict of Interest:**

26 The authors have nothing to disclose.

27 **Sources of Support:**

28 This work was supported by the Genomics and Computational Biology Graduate  
29 program at The University of Pennsylvania (to G.P.W.); the Gordon and Betty Moore  
30 Foundation's Data Driven Discovery Initiative (grant number GBMF 4552 to C.S.G);  
31 the National Institute of Dental & Craniofacial Research (grant number NIH  
32 F32DE026346 to D.W.Y.); S.F.A.G is supported by the Daniel B. Burke Endowed  
33 Chair for Diabetes Research. D.W.Y. is supported by NIH-NRSA F32 DE

34

35

36

37

38

39

40

41

42 **Abstract:**

43 Genome wide association studies (GWAS) have contributed significantly to the  
44 understanding of complex disease genetics. However, GWAS only report associated signals  
45 and do not necessarily identify culprit genes. As most signals occur in non-coding regions  
46 of the genome, it is often challenging to assign genomic variants to the underlying causal  
47 mechanism(s). Topologically associating domains (TADs) are primarily cell-type  
48 independent genomic regions that define interactome boundaries and can aid in the  
49 designation of limits within which an association most likely impacts gene function. We  
50 describe and validate a computational method that uses the genic content of TADs to  
51 discover candidate genes. Our method, called “TAD\_Pathways”, performs a Gene  
52 Ontology (GO) analysis over genes that reside within TAD boundaries corresponding to  
53 GWAS signals for a given trait or disease. We applied our pipeline to the GWAS catalog  
54 entries associated with bone mineral density (BMD), identifying ‘Skeletal System  
55 Development’ (Benjamini-Hochberg adjusted  $p=1.02 \times 10^{-5}$ ) as the top ranked pathway. In  
56 many cases, our method implicated a gene other than the nearest gene. Our molecular  
57 experiments describe a novel example: *ACP2*, implicated at the canonical ‘*ARHGAP1*’  
58 locus. We found *ACP2* to be an important regulator of osteoblast metabolism, whereas  
59 *ARHGAP1* was not supported. Our results via the example of BMD demonstrate how basic  
60 principles of three-dimensional genome organization can define biologically informed  
61 association windows.

62

63

64

65 **Keywords:**

66 Candidate gene method, genome wide association study, topologically associating  
67 domains, pathway analysis, bone mineral density

68

69 **Introduction:**

70 GWAS have been applied to over 300 different traits, leading to the discovery of  
71 important disease associations<sup>1</sup>. However, assigning signals to causal genes has proven  
72 difficult because these signals fall principally within noncoding regions and do not  
73 necessarily implicate the nearest gene<sup>2,3</sup>. For example, a signal found in an *FTO* intron has  
74 been shown to physically interact with and lead to the differential expression of other  
75 genes, and not *FTO* itself<sup>4</sup>. Moreover, there is evidence suggesting a type 2 diabetes  
76 GWAS association impacting *TCF7L2* also influences *ACSL5*<sup>5</sup>. It remains unclear how  
77 pervasive these kinds of associations are, but similar strategies are necessary in order for  
78 GWAS to better guide research and precision medicine<sup>6</sup>.

79 Chromatin interaction studies have discovered key genome organization principles  
80 including TADs<sup>7</sup>. TADs are genomic regions defined by increased contact frequency,  
81 consistency across cell types, and their enrichment of insulator element flanks<sup>8</sup>. Therefore,  
82 TADs can be used as boundaries of where non-coding causal variants will most likely  
83 impact tissue independent function.

84 We developed a computational approach, called “TAD\_Pathways”, which uses TADs  
85 to determine candidate genes. We validated our method using BMD GWAS<sup>9</sup>. Using our  
86 method, we identified *ACP2* as a novel regulator of osteoblast metabolism.

87

88 **Methods:**

89 *Computational procedures to identify candidate genes*

90 TAD\_Pathways is a computational method that uses TADs to discover candidate genes  
91 (**Figure 1A**). Alternative approaches either assign genes based on nearest gene or by an  
92 arbitrary or a linkage disequilibrium-based window of several kilobases<sup>10</sup> (**Figure 1B**).  
93 Here, we use human embryonic stem cell TAD boundaries as reported by Dixon *et al.* and  
94 converted to hg19 by Ho *et al.* to build TAD based genesets that consists of all Gencode  
95 genes that fall inside TADs implicated with BMD associations<sup>8,11</sup>. We perform a pathway  
96 overrepresentation test<sup>12</sup> for the input TAD genes against Gene Ontology (GO) terms<sup>13</sup>.  
97 This determines if the geneset is associated with any term at a higher probability than by  
98 chance. We included both experimentally confirmed and computationally inferred genes,  
99 which permit the inclusion of putative genes which do not necessarily have literature  
100 support, but are predicted computationally. For validation, we consider only the most  
101 significantly enriched term, but a user can also select multiple. Our method also supports  
102 custom input SNP lists. TAD\_Pathways software is available at  
103 [https://github.com/greenelab/tad\\_pathways](https://github.com/greenelab/tad_pathways).

104

105

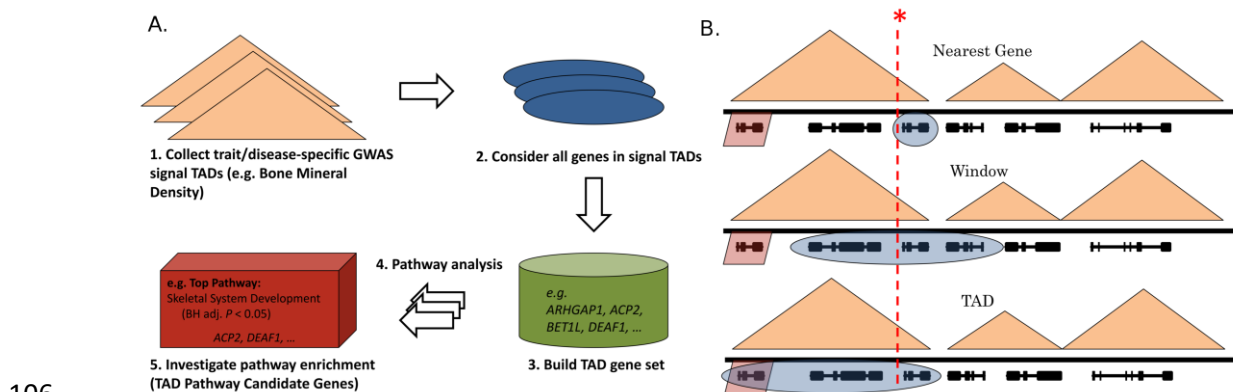

106

107 **Figure 1.** *Concepts motivating our approach.* Topologically associating domains (TADS)  
108 are shown as orange triangles, genes are shown as black lines, and a genome wide  
109 significant GWAS signal is shown as a dotted red line. (A) The TAD\_Pathways method.  
110 An example using Bone Mineral Density GWAS signals is shown. (B) Three hypothetical  
111 examples illustrated by a cartoon. The ground truth causal gene is shaded in red. The  
112 method-specific selected genes are shaded in blue. The top panel describes a nearest gene  
113 approach. The nearest gene in this scenario is not the gene actually impacted by the GWAS  
114 SNP. The middle panel describes a window approach. Based either on linkage  
115 disequilibrium or an arbitrarily sized window, the scenario does not capture the true gene.  
116 The bottom panel describes the TAD\_Pathways approach. In this scenario, the causal gene  
117 is selected for downstream assessment.

118

### 119 *Experimental knockdown of candidate genes*

120 We investigated two candidate genes predicted by TAD\_Pathways; *ACP2* and *DEAF1*.

121 The corresponding BMD GWAS loci rs7932354 (cytoband: 11p11.2) and rs11602954

122 (cytoband: 11p15.5) are assigned to *ARHGAP1* and *BET1L*, respectively. The candidate

123 genes were selected because no experimental support exists for their impact in bone and the

124 nearest genes to the GWAS signals do not have immediate bone related functional

125 implications. All experiments were conducted in three temporally separated independent

126 technical replicates from cryopreserved P2 aliquots of a human fetal osteoblast cell line

127 (ATCC hFOB 1.19 CRL-11372). Full experimental design can be found in the

128 accompanying **Supplementary Information**.

129 siRNA transfections were conducted using a commercial reagent system with cells  
130 assigned to one of 8 experimental groups: untreated control, siRNA-negative transfection  
131 reagent control, scrambled control siRNA, *TNAP* siRNA, *ARHGAP1* siRNA, *ACP2* siRNA,  
132 *BETIL* siRNA or Suppressin (*DEAF1*) siRNA.

133 For quantitative gene expression analysis, whole RNA was harvested at Day 4, isolated  
134 and reverse-transcribed. Duplicate 20ng templates for each gene of interest were assayed  
135 via real-time PCR using SYBR reagents. Results were analyzed using the  $2^{-ddCt}$  method  
136 using GAPDH as a housekeeping gene and reported as (mean $\pm$ standard deviation) fold-  
137 change versus untreated controls. Cellular metabolism/proliferation was assessed at 1 and 4  
138 days post-transfection using an MTT cell growth determination kit. Results are reported as  
139 the difference in mean absorbance at 570nm minus 690nm from Day 1 to Day 4 and error  
140 bars represent root-mean-square standard deviation from the measurements at both days.  
141 Early osteoblast differentiation was assessed at 4 days post-transfection using an alkaline  
142 phosphatase (ALP) kit. Dried plates were scanned and ALP+ intensities/areas were  
143 quantified in ImageJ. Values are reported as mean  $\pm$  standard deviation.

144

## 145 **Results:**

146 *TAD\_Pathways reveals candidate genes within phenotype-associated TADs*

147 We applied TAD\_Pathways to BMD GWAS results derived from replication-requiring  
148 journals<sup>9,14-16</sup>. Our method implicated ‘Skeletal System Development’ as the top ranked  
149 pathway (Benjamini-Hochberg adjusted  $p=1.02\times 10^{-5}$ ). For full BMD TAD\_Pathways refer  
150 to **Supplementary Table S1**. Many candidates were not the nearest gene to the GWAS  
151 signal and several had independent eQTL support (**Supplementary Table S2**).

152 *siRNA Knockdown of TAD\_Pathways Gene Predictions in Osteoblast Cells*

153 We targeted the expression of four of these genes *in vitro* using siRNA and assessed  
 154 transcriptional knockdown efficiency. Knockdown efficiencies were: *TNAP* 48.7±9.9%  
 155 ( $p=0.141$ ), *ARHGAP1* 68.7±14.3% ( $p=0.015$ ), *ACP2* 48.9±6.4% ( $p=0.035$ ), *BET1L*  
 156 56.4±1.0% ( $p>0.05$ ) and *DEAF1* 52.7±9.2% ( $p=0.021$ ) (**Figure 2**).

157 We noted variation across the three controls, with the scrambled siRNA control altering  
 158 expression of *OCN* (osteocalcin), *IBSP* (bone sialoprotein), *TNAP* and *BET1L* ( $p<0.05$ ).  
 159 Relative to the scrambled siRNA control, *OCN* was downregulated in all siRNA groups  
 160 ( $p<0.05$ ) except for *BET1L* siRNA ( $p=0.122$ ). *OSX*, *IBSP* and *TNAP* were not significantly  
 161 altered by any siRNA treatment (**Figure 2**).

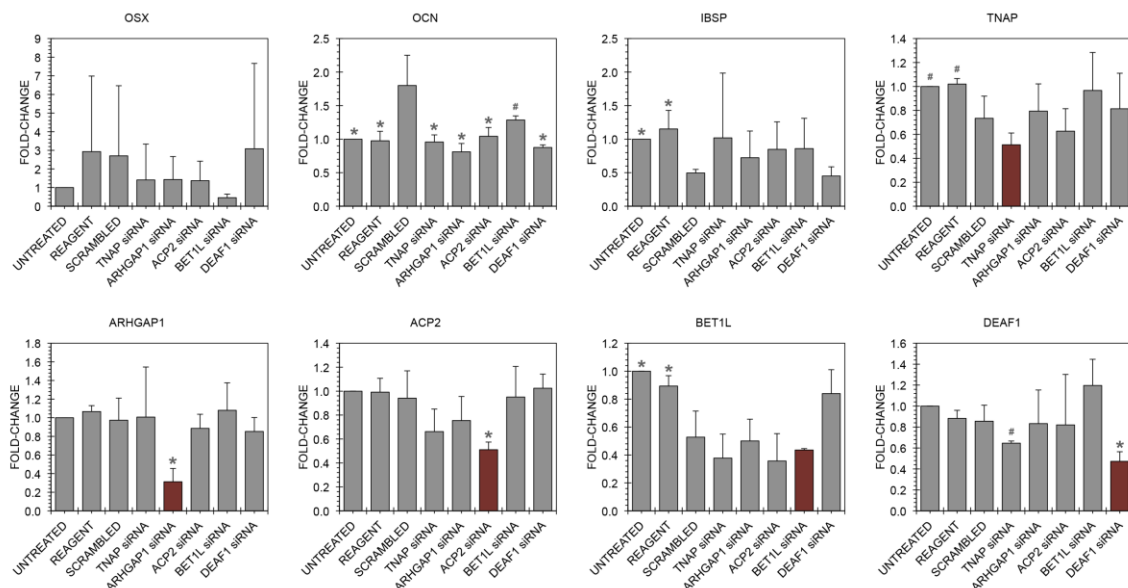

162

163 **Figure 2:** Real-time PCR of osteoblast differentiation genes and GWAS/TAD hits in hFOB  
 164 cells. siRNA was used to knock down expression of *TNAP* (positive control), *ARHGAP1*,  
 165 *ACP2*, *BET1L* and *DEAF1*. Relative expression of the osteoblast marker genes *OSX*, *OCN*  
 166 and *IBSP* suggest that GWAS/TAD hits are not major regulators of bone differentiation in  
 167 this model. Red bars highlight specificity of each siRNA knockdown. Values represent  
 168 mean ± standard deviation. Statistical significance relative to the scrambled siRNA control  
 169 is annotated as: \* $p \leq 0.05$  and # $p \leq 0.10$  using a two-tailed Student's *t*-test.



170 *Metabolic Activity of TAD\_Pathways Gene Predictions*

171 Treatment with *ACP2* siRNA led to a 66.0% reduction in MTT metabolic activity  
172 versus the scrambled siRNA control ( $p=0.012$ ). *ARHGAP1* siRNA caused a 38.8%  
173 reduction, falling short of statistical significance ( $p=0.088$ ). siRNA targeted against *TNAP*,  
174 *BET1L* or *DEAF1* did not alter MTT metabolic activity (**Figure 3A**).

175

176 *Alkaline Phosphatase Activity of TAD\_Pathways Gene Predictions*

177 ALP is highly expressed in osteoblasts; disruption of proliferation or osteoblast  
178 differentiation would result in downregulation of ALP. *TNAP* siRNA significantly reduced  
179 ALP intensity by  $5.98 \pm 1.77$  units versus the scrambled siRNA control ( $p=0.006$ ). *ACP2*  
180 siRNA also significantly reduced ALP intensity by  $8.74 \pm 2.11$  ( $p=0.003$ ). The control  
181 stained less intensely than untreated or transfection reagent controls, but this did not reach  
182 statistical significance ( $0.05 < p < 0.10$ ) (**Figure 3B**).

183

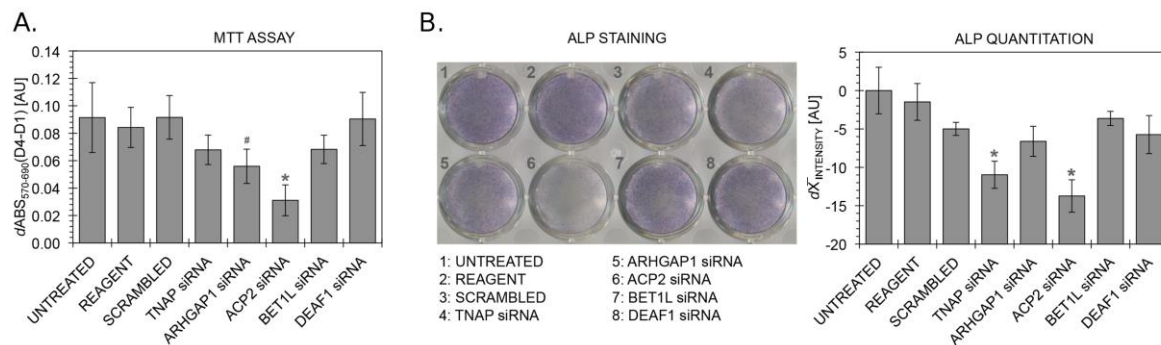

184 **Figure 3.** Validating two 'TAD Pathway' predictions for Bone Mineral Density GWAS hits  
185 on *hFOB* cells. siRNA was used to knock down expression of *TNAP*, *ARHGAP1*, *ACP2*,  
186 *BET1L* and *DEAF1*. (A) Knockdown of *ACP2* decreases cellular metabolic activity,  
187 demonstrated using an MTT assay. (B) ALP staining and quantitation indicates that  
188 knockdown of *TNAP* or *ACP2* inhibits performance in an osteoblast differentiation assay.  
189 Values represent mean  $\pm$  standard deviation. Statistical significance relative to the  
190 scrambled siRNA control is annotated as: \* $p \leq 0.05$  and # $p \leq 0.10$  using a two-tailed  
191 Student's *t*-test.

192 **Discussion:**

193 We showed that TAD\_Pathways can reveal functional gene to intermediate phenotype  
194 relationships using BMD. Several of the TAD\_Pathways genes, such as *LRP5*, are *bona*  
195 *fide* BMD genes already identified by nearest gene GWAS, eQTL analyses, and clinical  
196 syndromes<sup>17</sup>, thus providing positive controls. However, several BMD GWAS signals do  
197 not have obvious nearest-gene associations with bone. Our results suggest that a nearby  
198 gene *ACP2*, and not the nearest gene *ARHGAP1*, regulates osteoblast proliferation/viability.

199 There are several limitations to the approach. Publication biases from pathway curation  
200 present challenges<sup>18</sup>. To lessen this bias, we include curated and computationally predicted  
201 GO annotations. Additionally, we used TAD boundaries defined by Dixon *et al.*, whereas  
202 increased Hi-C resolution reduced estimated TAD sizes<sup>19</sup>. Despite our method using larger  
203 TADs, thus including more presumably false positive genes, we still identify relevant  
204 pathways. Furthermore, the method will likely fail in a disease instigated by aberrant  
205 looping. We were also concerned that TAD\_Pathways would work only in BMD. Indeed,  
206 when we applied TAD\_Pathways to Type 2 Diabetes, we also identify several candidate  
207 genes that are not the nearest gene (see Supplementary Table S3). Moreover, the  
208 experimental validation was performed in a simplified *in vitro* cell culture system lacking  
209 organismal complexity, and the cell line selected is tetraploid, which may partially  
210 compensate for gene knockdown. While TAD\_Pathways identified several candidate genes,  
211 we only examined two, and our validation approach does not directly interrogate each SNP.  
212 Lastly, one of the investigated GWAS SNPs, rs7932354, located in the *ARHGAP1*  
213 promoter, is an *ARHGAP1* eQTL in several tissues as determined by GTEx<sup>20</sup>. However,

214 none of these tissues are bone related and our screen did not implicate *ARHGAP1* in  
215 osteoblast processes.

216 In conclusion, TAD\_Pathways can be used as a candidate gene discovery tool that uses  
217 chromatin looping to map associations to candidate genes. We also validated our method by  
218 implicating *ACP2* as a gene involved in BMD determination, which warrants future  
219 investigation. We believe TAD\_Pathways and algorithms that leverage 3D genomic  
220 structure will be poised to discover novel disease features.

221

## 222 **Acknowledgements**

223 Hannah E. Sexton and Troy L. Mitchell assisted in optimizing siRNA transfection  
224 conditions. Daniel Himmelstein and Amy Campbell performed analytical code review.

225

## 226 **Conflict of Interest**

227 The authors have nothing to disclose.

228

## 229 **Availability of data and material**

230 All data used to construct the TAD\_Pathways approach are publically available  
231 datasets. We make all software used to develop this approach publically available in a  
232 GitHub repository ([http://github.com/greenelab/tad\\_pathways](http://github.com/greenelab/tad_pathways)). We also provide a  
233 docker image ([https://hub.docker.com/r/gregway/tad\\_pathways/](https://hub.docker.com/r/gregway/tad_pathways/)) and archive the  
234 GitHub software on Zenodo (<https://zenodo.org/record/163950>).

235

236

237 **References:**

- 238 1 Welter D, MacArthur J, Morales J, Burdett T, Hall P, Junkins H *et al.* The NHGRI  
239 GWAS Catalog, a curated resource of SNP-trait associations. *Nucleic Acids Res* 2014;  
240 **42**: D1001–D1006.
- 241 2 Brodie A, Azaria JR, Ofran Y. How far from the SNP may the causative genes be?  
242 *Nucleic Acids Res* 2016; : gkw500.
- 243 3 Ward LD, Kellis M. Interpreting noncoding genetic variation in complex traits and  
244 human disease. *Nat Biotechnol* 2012; **30**: 1095–1106.
- 245 4 Claussnitzer M, Dankel SN, Kim K-H, Quon G, Meuleman W, Haugen C *et al.* *FTO*  
246 Obesity Variant Circuitry and Adipocyte Browning in Humans. *N Engl J Med* 2015;  
247 **373**: 895–907.
- 248 5 Xia Q, Chesi A, Manduchi E, Johnston BT, Lu S, Leonard ME *et al.* The type 2  
249 diabetes presumed causal variant within *TCF7L2* resides in an element that controls the  
250 expression of *ACSL5*. *Diabetologia* 2016; **59**: 2360–2368.
- 251 6 Herman MA, Rosen ED. Making Biological Sense of GWAS Data: Lessons from the  
252 *FTO* Locus. *Cell Metab* 2015; **22**: 538–539.
- 253 7 Lieberman-Aiden E, van Berkum NL, Williams L, Imakaev M, Ragooczy T, Telling A  
254 *et al.* Comprehensive Mapping of Long-Range Interactions Reveals Folding Principles  
255 of the Human Genome. *Science* 2009; **326**: 289–293.
- 256 8 Dixon JR, Selvaraj S, Yue F, Kim A, Li Y, Shen Y *et al.* Topological domains in  
257 mammalian genomes identified by analysis of chromatin interactions. *Nature* 2012;  
258 **485**: 376–380.
- 259 9 Estrada K, Styrkarsdottir U, Evangelou E, Hsu Y-H, Duncan EL, Ntzani EE *et al.*  
260 Genome-wide meta-analysis identifies 56 bone mineral density loci and reveals 14 loci  
261 associated with risk of fracture. *Nat Genet* 2012; **44**: 491–501.
- 262 10 Hao K, Di X, Cawley S. LdCompare: rapid computation of single- and multiple-marker  
263  $r^2$  and genetic coverage. *Bioinformatics* 2007; **23**: 252–254.
- 264 11 Ho JWK, Jung YL, Liu T, Alver BH, Lee S, Ikegami K *et al.* Comparative analysis of  
265 metazoan chromatin organization. *Nature* 2014; **512**: 449–452.
- 266 12 Wang J, Duncan D, Shi Z, Zhang B. WEB-based GEne SeT AnaLysis Toolkit  
267 (WebGestalt): update 2013. *Nucleic Acids Res* 2013; **41**: W77–W83.
- 268 13 Ashburner M, Ball CA, Blake JA, Botstein D, Butler H, Cherry JM *et al.* Gene  
269 Ontology: tool for the unification of biology. *Nat Genet* 2000; **25**: 25–29.

- 270 14 Richards JB, Rivadeneira F, Inouye M, Pastinen TM, Soranzo N, Wilson SG *et al.*  
271 Bone mineral density, osteoporosis, and osteoporotic fractures: a genome-wide  
272 association study. *Lancet Lond Engl* 2008; **371**: 1505–1512.
- 273 15 Rivadeneira F, Styrkársdóttir U, Estrada K, Halldórsson BV, Hsu Y-H, Richards JB *et*  
274 *al.* Twenty bone-mineral-density loci identified by large-scale meta-analysis of  
275 genome-wide association studies. *Nat Genet* 2009; **41**: 1199–1206.
- 276 16 Styrkarsdóttir U, Thorleifsson G, Sulem P, Gudbjartsson DF, Sigurdsson A, Jonasdóttir  
277 A *et al.* Nonsense mutation in the LGR4 gene is associated with several human diseases  
278 and other traits. *Nature* 2013; **497**: 517–520.
- 279 17 Baron R, Kneissel M. WNT signaling in bone homeostasis and disease: from human  
280 mutations to treatments. *Nat Med* 2013; **19**: 179–192.
- 281 18 Greene CS, Troyanskaya OG. Accurate evaluation and analysis of functional genomics  
282 data and methods: Accurate evaluation and analysis of functional genomics data and  
283 methods. *Ann N Y Acad Sci* 2012; **1260**: 95–100.
- 284 19 Rao SSP, Huntley MH, Durand NC, Stamenova EK, Bochkov ID, Robinson JT *et al.* A  
285 3D Map of the Human Genome at Kilobase Resolution Reveals Principles of  
286 Chromatin Looping. *Cell* 2014; **159**: 1665–1680.
- 287 20 Aguet F, Brown AA, Castel S, Davis JR, Mohammadi P, Segre AV *et al.* Local genetic  
288 effects on gene expression across 44 human tissues.  
289 2016<http://biorxiv.org/lookup/doi/10.1101/074450> (accessed 3 Jan2017).

290
